# Supplementary material for: Transcriptomic Profile of Canine DH82 Macrophages Infected by Leishmania infantum Promastigotes with Different Virulence Behavior
Source: MDPI journal article supplement (doi:10.3390/ijms23031466), 2022-01-27
Supplement: s1 [file s1]

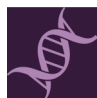

**Supplementary Table S3.** Read alignment to the *Leishmania infantum* genome

| Sample | Total reads | Total mapped reads | Mapping rate (%) |
|--------|-------------|--------------------|------------------|
| BCN R1 | 21413648    | 8182463            | 38.21            |
| BCN R2 | 22326356    | 8500058            | 38.07            |
| BCN R3 | 20144002    | 7761730            | 38.53            |
| BOS R1 | 20096416    | 7566644            | 37.65            |
| BOS R2 | 18457056    | 6840244            | 37.06            |
| BOS R3 | 19497644    | 7480189            | 38.36            |
