# Supplementary material for: Transcriptomic Profile of Canine DH82 Macrophages Infected by Leishmania infantum Promastigotes with Different Virulence Behavior
Source: MDPI journal article supplement (doi:10.3390/ijms23031466), 2022-01-27
Supplement: s1 [file s1]

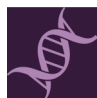

**Supplementary Table S1. RNA-seq data quality summary**

| Sample | Raw reads | Clean reads | Error rate (%) | Q20(%) | Q30 (%) | GC (%) |
|--------|-----------|-------------|----------------|--------|---------|--------|
| NI R1  | 43175966  | 42803376    | 0.02           | 98.03  | 94.52   | 50.00  |
| NI R2  | 42524308  | 42178430    | 0.02           | 98.05  | 94.53   | 49.04  |
| NI R3  | 47038553  | 46626622    | 0.02           | 98.01  | 94.39   | 49.58  |
| BCN R1 | 45166943  | 44550696    | 0.02           | 97.92  | 94.34   | 51.69  |
| BCN R2 | 47368713  | 46867870    | 0.03           | 97.87  | 94.21   | 51.88  |
| BCN R3 | 41440103  | 41044095    | 0.03           | 97.88  | 94.23   | 51.80  |
| BOS R1 | 43741209  | 43249902    | 0.02           | 97.91  | 94.30   | 51.41  |
| BOS R2 | 40854656  | 40368080    | 0.02           | 97.99  | 94.49   | 51.50  |
| BOS R3 | 41435550  | 40850676    | 0.02           | 98.05  | 94.65   | 51.56  |
