# Supplementary material for: Transcriptomic Profile of Canine DH82 Macrophages Infected by Leishmania infantum Promastigotes with Different Virulence Behavior
Source: MDPI journal article supplement (doi:10.3390/ijms23031466), 2022-01-27
Supplement: s1 [file s1]

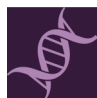

**Supplementary Table S2. Read alignment to the *Canis lupus familiaris* genome**

| Sample | Total reads | Total mapped reads | Mapping rate (%) |
|--------|-------------|--------------------|------------------|
| NI R1  | 85606752    | 81804853           | 95.56            |
| NI R2  | 84356860    | 80920542           | 95.93            |
| NI R3  | 93253244    | 89230524           | 95.69            |
| BCN R1 | 89101392    | 70090761           | 78.66            |
| BCN R2 | 93735740    | 73992850           | 78.94            |
| BCN R3 | 82088190    | 64195954           | 78.20            |
| BOS R1 | 86499804    | 68713256           | 79.44            |
| BOS R2 | 80736160    | 64485975           | 79.87            |
| BOS R3 | 81701352    | 64312991           | 78.72            |
